# Supplementary material
Source: HighWire-hosted journal article supplement (https://bmjpaedsopen.bmj.com/content/2/1/e000299)
Supplement: inline-supplementary-material-1 [file inline-supplementary-material-1.docx]

# Interview Protocol

Questions for adolescents with CFS/ME who have accessed the internet for information/support for their condition.

Set the Dictaphone.

***Use the individual’s terminology for CFS/ME.

1. ***Have you ever used the internet for CFS/ME*? Can you tell me about this?***
2. ***Why did you decide to go online?***

[Did someone recommend this - who?

Were you searching for something in particular- information / support?]

1. ***Can you tell me about the site/s you accessed?***

[Did it have a name?

What sort of website was it? e .g. health forum, organisation website, social media site, blog What were the other users like?

How did you decide on this site?]

## Can you tell me what happened when you went on this site/ these sites?

[What did you do? did you just look/ did you participate/ what did you find/ what did you write? How long did you use the site for? How often?

How did you feel/ think? ]

## Did anything change?

[Did you learn anything e.g. about the condition, treatment, strategies? Did it change how you felt?

Did you do anything differently- strategies, management?

Did you start using the site regularly? Did you go online more/less?]

## What are your overall thoughts and feeling about going online for information/support for CFS/ME*?

[Can you talk to me about helpful/unhelpful/ good/bad aspects?

Can you think of anything that could be useful?]

## Do you have anything else you would like to add?

1. ***Do you have any questions?***

**Continue to debriefing**
